# Supplementary material for: Heterogeneous growth mechanism of ZnO nanostructures and the effects of their morphology on optical and photocatalytic properties
Source: Royal Society of Chemistry journal article supplement (doi:10.1039/c7ce00609h), 2017-01-01
Supplement: c7ce00609h1.pdf [file c7ce00609h1.pdf]

## Supporting Information

### Heterogeneous Growth Mechanism of ZnO Nanostructures and their Morphology Effect on Optical and Photocatalytic Properties

Abdo Hezam <sup>a</sup>, K. Namratha <sup>a</sup>, Q.A. Drmish <sup>b</sup>, Bananakere Nanjegowda Chandrashekar <sup>c</sup>, Kishor Kumar Sadasivuni <sup>d</sup>, Zain Yemani <sup>b</sup>, Chun Cheng <sup>c</sup>, and K. Byrappa <sup>a,\*</sup>

<sup>a</sup> Centre for Materials Science and Technology, University of Mysore, Vijaya Bhavana, P.B.No.21, Manasagangothri, Mysuru-570006, India.

<sup>b</sup> Center of Research Excellence in Nanotechnology and Physics Department, King Fahd University of Petroleum and Minerals, Dhahran 31261, Saudi Arabia.

<sup>c</sup> Department of Materials Science and Engineering and Shenzhen Key Laboratory of Nanoimprint Technology, Southern University of Science and Technology, Shenzhen 518055, P. R. China.

<sup>d</sup> Department of Mechanical & Industrial Engineering, Qatar University, P.O. Box 2713, Doha, Qatar.

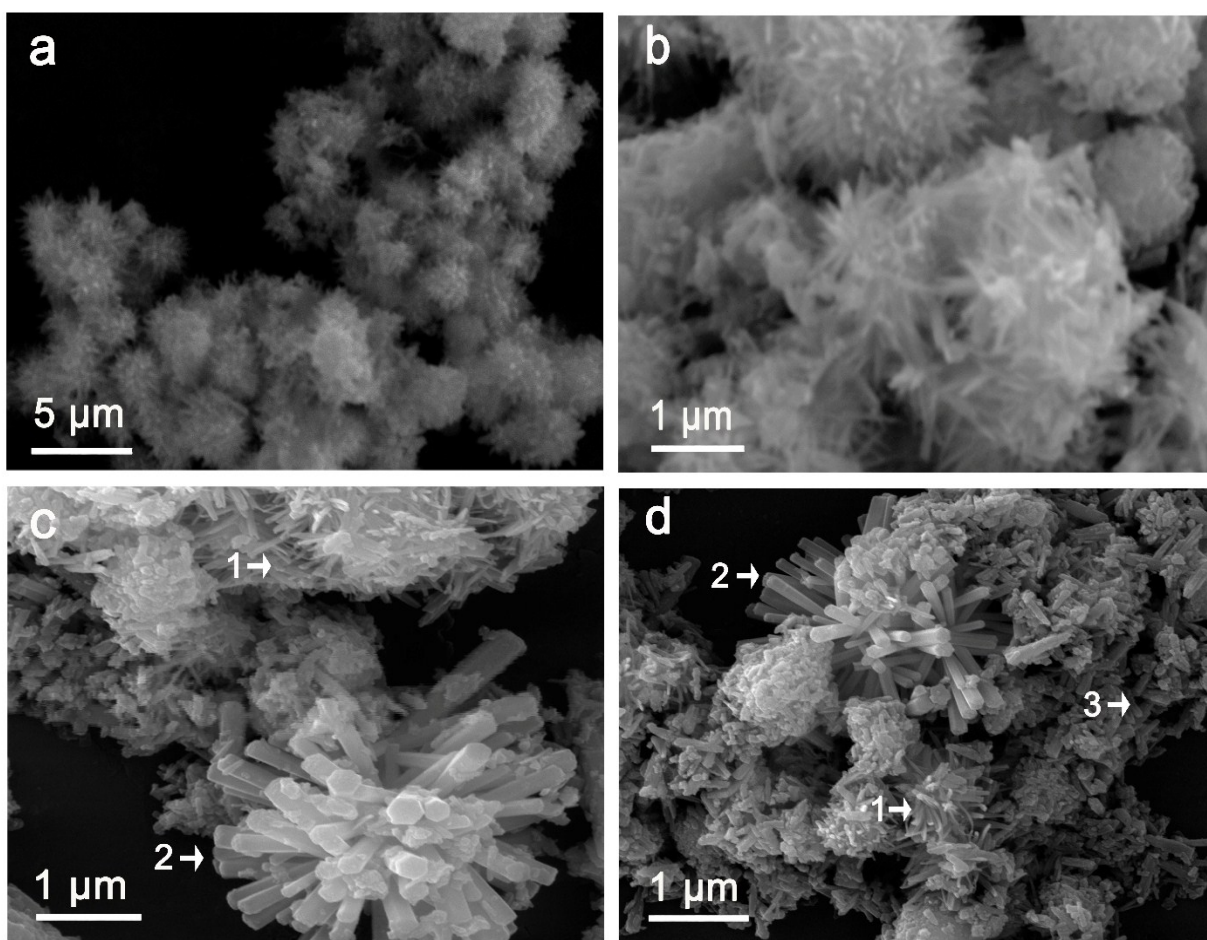

Figure S1 SEM images of ZnO flowers hydrothermally prepared in the presence of DEA at 190 °C for (a) and (b) 15 min, (c) 30 min, and (d) 45 min.

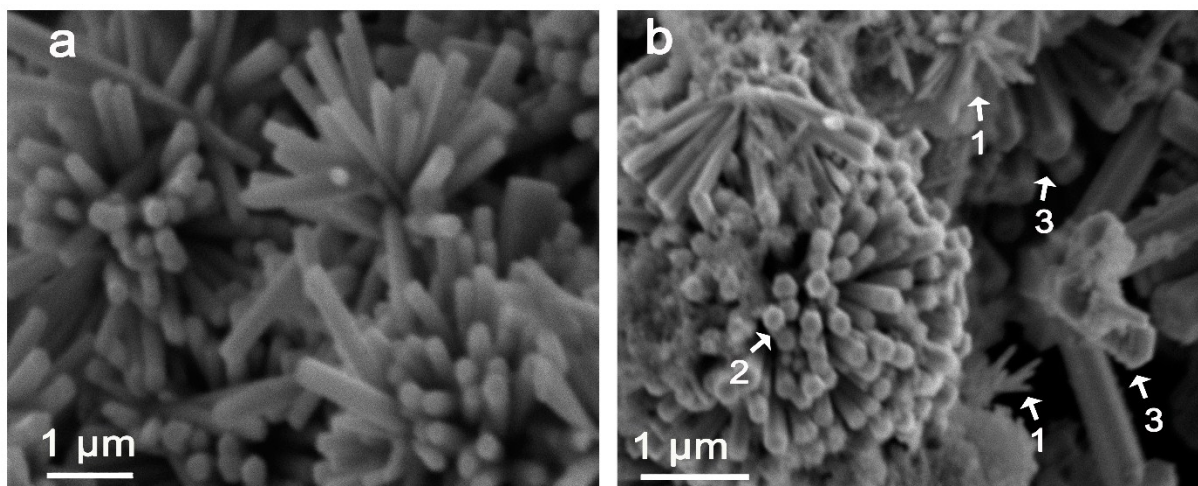

Figure S2 SEM images of ZnO flowers hydrothermally prepared in the presence of gluconic acid at 190 °C for (a), 15 min and (b)30 min.

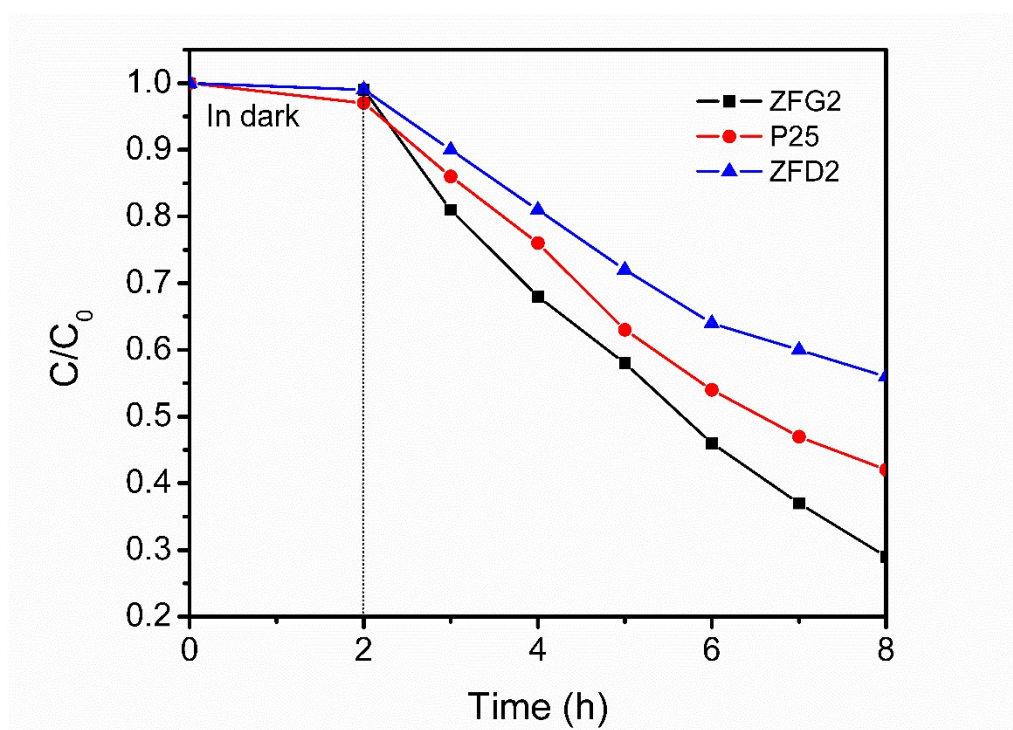

Fig. S3. The adsorption and degradation efficiency of 4-CP (1 mg L<sup>-1</sup>, 50 mL, pH = 6.5) versus the exposure time under sunlight irradiation in the presence of 30 mg of ZFG2, TiO<sub>2</sub>-P25, and ZFD2.
